# Supplementary material for: Nitrogen-induced interfacial electronic structure of NiS2/CoS2with optimized water and hydrogen binding abilities for efficient alkaline hydrogen evolution electrocatalysis
Source: Royal Society of Chemistry journal article supplement (doi:10.1039/d1ta07186f), 2021-11-22
Supplement: d1ta07186f1.pdf [file d1ta07186f1.pdf]

## Supporting Information

**Nitrogen-induced interfacial electronic structure of NiS<sub>2</sub>/CoS<sub>2</sub> with optimized water and hydrogen binding abilities for efficient alkaline hydrogen evolution electrocatalysis**

*Bocheng Qiu,\* Yuefeng Zhang, Xuyun Guo, Yingxin Ma, Mengmeng Du, Jun Fan, Ye Zhu, Zhiyuan Zeng,\* and Yang Chai\**

## Experimental Section/Methods

**Chemicals.** High purity (analytical reagent) chemicals, including  $\text{CoCl}_2 \cdot 6\text{H}_2\text{O}$ ,  $\text{NiCl}_2 \cdot 6\text{H}_2\text{O}$ ,  $\text{Na}_2\text{S}_2\text{O}_3 \cdot 5\text{H}_2\text{O}$ ,  $\text{CuCl}_2 \cdot 2\text{H}_2\text{O}$ ,  $\text{NaOH}$ , ascorbic acid, thioacetamide, and sulfur powder, were purchased from Aladdin. Polyvinyl pyrrolidone (PVP, K30) and Platinum on carbon (Pt/C, 20 wt. %) were purchased from Alfa Aesar Chemical Co., Ltd. Carbon paper was purchased from CeTech Co., Ltd. The water used all the experiments were de-ionized.

**Preparation of  $\text{Cu}_2\text{O}$  nanocubes.** The  $\text{Cu}_2\text{O}$  nanocubes were synthesized by the previously reported method.<sup>[1]</sup> Typically, 170 mg  $\text{CuCl}_2 \cdot 2\text{H}_2\text{O}$  was dissolved in 100 mL water and heated to 55 °C. Then, 10 mL 2 M  $\text{NaOH}$  was slowly dropped into the above solution to form a brown suspension. After 30 min stirring, 10 mL 0.6 M ascorbic acid was dropwise introduced into the suspension. After aging for 3 h, the  $\text{Cu}_2\text{O}$  precipitate was collected by centrifugation, followed by washing with water two times and ethanol once, and finally dried in a vacuum at 40 °C overnight.

**Preparation of  $\text{Ni}(\text{OH})_2/\text{Co}(\text{OH})_2$  nanocages.** 20 mg  $\text{Cu}_2\text{O}$  powder was dispersed into the mixed solvent comprised of 20 mL deionized (DI) water and 20 mL ethanol with the assistance of ultrasound treatment. Afterwards, 3.4 mg  $\text{CoCl}_2 \cdot 6\text{H}_2\text{O}$  and 1.7 mg  $\text{NiCl}_2 \cdot 6\text{H}_2\text{O}$  (the ratio of Ni/Co is 1:2) were added into the above suspension under magnetic stirring. After stirring for 30 min, 330 mg polyvinyl pyrrolidone (PVP, K30) was dissolved into the solution. After stirring for another 30min, 50 mL 1 M  $\text{Na}_2\text{S}_2\text{O}_3$  solution was drop-by-drop introduced into the suspension. Once the color of the solution completely changed from brick-red to transparent green, the resulting precipitate was centrifuged and washed by DI water and ethanol, and finally vacuum-dried at 40 °C. Besides, the  $\text{Ni}(\text{OH})_2/\text{Co}(\text{OH})_2$  nanocages with other Ni/Co molar ratios (1:1 and 1:3) were also prepared. Note that the total addition masses for  $\text{CoCl}_2 \cdot 6\text{H}_2\text{O}$  and  $\text{NiCl}_2 \cdot 6\text{H}_2\text{O}$  is kept at 5.1 mg. As for the bare  $\text{Co}(\text{OH})_2$  or  $\text{Ni}(\text{OH})_2$  nanocages, the preparation procedure is similar to that of  $\text{Ni}(\text{OH})_2/\text{Co}(\text{OH})_2$  nanocages, except that 3.4 mg  $\text{CoCl}_2 \cdot 6\text{H}_2\text{O}$  and 1.7 mg  $\text{NiCl}_2 \cdot 6\text{H}_2\text{O}$  were replaced by 5.1 mg  $\text{CoCl}_2 \cdot 6\text{H}_2\text{O}$  or 5.1 mg  $\text{NiCl}_2 \cdot 6\text{H}_2\text{O}$ , respectively.

**Preparation of N- $\text{NiS}_2/\text{CoS}_2$  nanocages.** Typically, the N- $\text{NiS}_2/\text{CoS}_2$  powders with different Ni/Co ratios were obtained by annealing their corresponding  $\text{Ni}(\text{OH})_2/\text{Co}(\text{OH})_2$  nanocages (50 mg) and thiourea powder (500 mg) at 350 °C for 2 h with a heating rate of 10 °C  $\text{min}^{-1}$  under a flow of Ar atmosphere. Note that thiourea powder was located at the upstream side of the furnace and the  $\text{Ni}(\text{OH})_2/\text{Co}(\text{OH})_2$  powder was placed at the downstream side.

**Preparation of  $\text{NiS}_2/\text{CoS}_2$  nanocages.** The synthesis procedure of  $\text{NiS}_2/\text{CoS}_2$  nanocages was similar to that of N- $\text{NiS}_2/\text{CoS}_2$  nanocages except using sulfur powder instead of thiourea powder.

**Preparation of  $\text{NiS}_2$  nanocages.** The synthetic method of  $\text{NiS}_2$  nanocages was similar

to that of NiS<sub>2</sub>/CoS<sub>2</sub>, except that Ni(OH)<sub>2</sub>/Co(OH)<sub>2</sub> was replaced by Ni(OH)<sub>2</sub>.

**Preparation of CoS<sub>2</sub> nanocages.** The synthetic method of CoS<sub>2</sub> was similar to that of NiS<sub>2</sub>/CoS<sub>2</sub>, except that Ni(OH)<sub>2</sub>/Co(OH)<sub>2</sub> was replaced by Co(OH)<sub>2</sub>.

**Materials Characterizations.** Field-emission scanning electron microscope (FESEM) carried out on TESCAN MIRA3 was employed to observe the surface morphology of the samples. Transmission electron microscope (TEM), high resolution transmission electron microscope (HRTEM), and energy-dispersive X-ray spectroscopy (EDX) attached to the HRTEM were recorded on JEOL 2100F. HAADF-STEM image and elemental mapping were collected using a TEM (JEOL, JEM-2100F) equipped with EDX spectroscopy. XRD patterns of all the samples were recorded on a RigakuD/MAX 2550 diffract meter (Cu K radiation,  $\lambda = 1.5406 \text{ \AA}$ ) operated at 40 kV and 100 mA and collected in the range from 10° to 80° (2 $\theta$ ). Surface area measurements of the samples were conducted on an ASAP2020 instrument at 77 K. The chemical states of the samples were analyzed by X-ray photoelectron spectroscopy (XPS, Perkin-Elmer PHI 5000C ESCA) using Al K $\alpha$  radiation operated at 250 W with C 1s (284.6 eV) as calibration reference.

**Electrochemical Measurements.** Catalysts (5 mg) were dispersed in 760  $\mu\text{L}$  of ethanol, 200  $\mu\text{L}$  of DI water and 40  $\mu\text{L}$  of 5 wt% Nafion solution to form a homogeneous ink with the assistance of ultrasound treatment. For the preparation of working electrodes, 20  $\mu\text{L}$  of catalyst inks was homogeneously dispersed onto the carbon fiber paper (0.25 cm<sup>2</sup>) and then dried at room temperature. The mass loading of catalysts was calculated to 0.4 mg cm<sup>-2</sup>. The Pt/C electrode was prepared with the same catalysts loading of 0.4 mg cm<sup>-2</sup> (Note that the Pt loading amount was calculated to be 80  $\mu\text{g cm}^{-2}$ ). Graphite and Hg/HgO electrode were used as the counter electrode and reference electrode, respectively. Potentials were referenced to a reversible hydrogen electrode (RHE):  $E_{\text{RHE}} = E_{\text{Hg/HgO}} + 0.098 + 0.059 \times \text{pH}$ . The overpotential ( $\eta$ ) was calculated according to the following formula:  $\eta = E_{\text{RHE}}$ . Linear sweep voltammetry (LSV) was recorded in a H<sub>2</sub>-saturated 1.0 M KOH at a scan rate of 5 mV s<sup>-1</sup>. All the polarization curves presented were corrected for IR loss (The introduction of IR corrected polarization curves makes up for the electrode potential loss at medium to high current region caused by the solution resistance). The compensated potential was corrected by  $E_{\text{compensated}} = E_{\text{measured}} - i \times R_s$ , where  $R_s$  was determined by the electrochemical workstation. The stability tests were carried out by cyclic voltammetry (CV) sweeps from -0.2 to 0.1V (vs RHE) at the scan rate of 50 mV s<sup>-1</sup> for 2000 cycles and chronopotentiometry at a constant current density of 10 and 50 mA cm<sup>-2</sup>. The electrochemical impedance spectroscopy (EIS) measurements were measured at an overpotential of 100 mV in the frequency range of 0.1 to 100k Hz with an amplitude of 5 mV. The electrochemical active surface area (ECSA) was calculated from the CV curves measured in a potential range from 0.89 to 0.99 V (E vs. RHE) in terms of the following equation:  $C_{\text{dl}} = (j_a - j_c)/(2 \cdot v) = \Delta j/(2 \cdot v)$ , where  $C_{\text{dl}}$ ,

$j_a$ ,  $j_c$  and  $v$  are the double-layer capacitance ( $\text{F cm}^{-2}$ ), the anodic current density ( $\text{mA cm}^{-2}$ ), the cathodic current density ( $\text{mA cm}^{-2}$ ), and scan rate ( $\text{mV s}^{-1}$ ), respectively. Note that  $j_a$  and  $j_c$  were recorded at 0.94 V (*V*s. RHE) and the slope of the  $\Delta j$  vs scan rate curve is just twice of the value of  $C_{dl}$ . The roughness factors (RF) of different samples from their  $C_{dl}$  values by using the equation:  $\text{RF} = C_{dl}/C_s$ , where  $C_s$  is the double layer capacitance of an ideally flat electrode, which is usually taken as  $40 \mu\text{F cm}^{-2}$  in an alkaline electrolyte according to the typical references.<sup>[2]</sup>

**Density Functional Theory Calculations.** All the calculations were carried out by employing periodic density functional theory methods as implemented in the Vienna ab-initio simulation package(VASP)<sup>[3, 4]</sup>. The interaction between atomic cores and valence electrons was represented by the projector augmented wave (PAW). The generalized gradient approximation (GGA) with the Perdew-Burke-Ernzerhof (PBE) functional<sup>[5]</sup> was used for the exchange-correlation energies. The effective U parameter was set as 3.5 eV for the 3d states of Co and Ni.<sup>[6]</sup> The cut off energy was set at 420 eV. The geometry convergence criterion for the maximum force on each atom is set to be less than  $0.02 \text{ eV}/\text{\AA}$ . In K-sampling, a Monkhorst mesh of  $2 \times 2 \times 1$  was considered for structural optimization. The vacuum layer thickness is set to be 15  $\text{\AA}$  to avoid interactions among interlayers. The lateral heterojunction model was constructed by using  $\text{CoS}_2$  (200) plane and  $\text{NiS}_2$  (200) plane. The bottom two layers of heterojunction are fixed at bulk truncated positions during optimisation while the remaining atoms relaxed. The N- $\text{NiS}_2/\text{CoS}_2$  model was constructed by replacing a sulfur atom near the interface with a N atom. The climbing image nudged elastic band (CI-NEB) method<sup>[7]</sup> was used to calculate the reaction energy barriers, and the relaxed transition state was verified by vibration frequency analysis. In terms of hydrogen evolution reaction (HER), the free energy change for H adsorption on heterojunction models were defined as:

$$\Delta G_H = E_{total} - E_{sur} - \frac{1}{2}E_{H2} + \Delta E_{ZPE} - T\Delta S$$

Where  $E_{total}$ ,  $E_{sur}$ ,  $E_{H2}$  are the calculated energies of the adsorption state, a clean surface and a molecule hydrogen, respectively. T is the temperature,  $\Delta E_{ZPE}$  and  $\Delta S$  are the correction of the zero point energy and entropy, respectively.

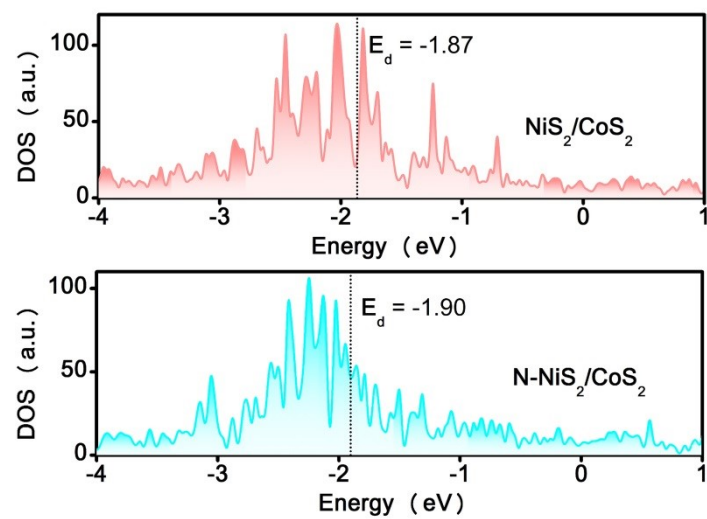

**Fig. S1** The projected d-band density of states (DOS) of NiS<sub>2</sub>/CoS<sub>2</sub> and N-NiS<sub>2</sub>/CoS<sub>2</sub>.

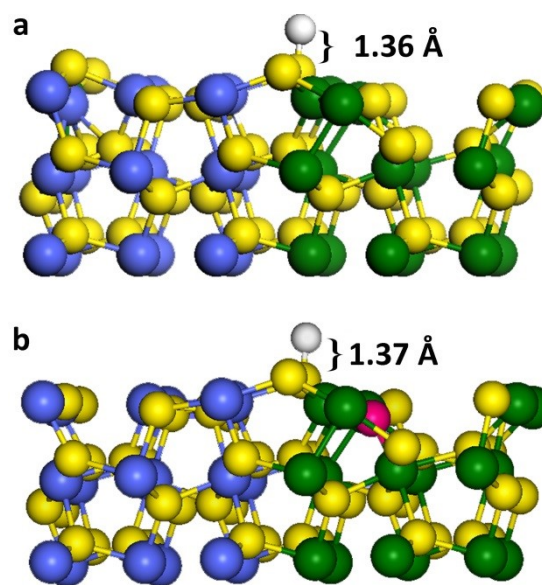

**Fig. S2** The variations of the S-H<sub>ads</sub> bond length (a) before and (b) after N doping.

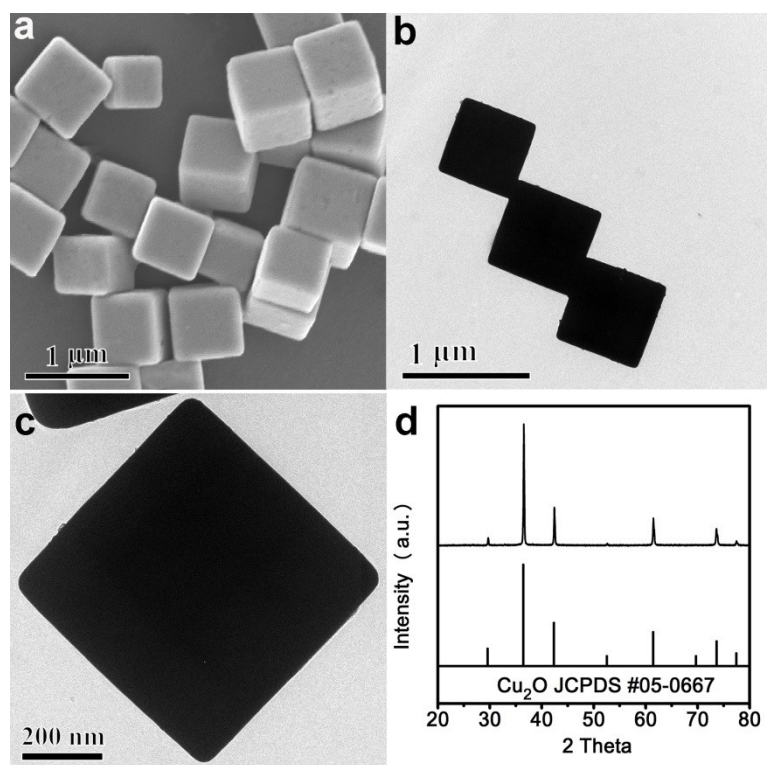

**Fig. S3** (a) SEM image, (b,d) TEM images, and (d) XRD pattern of Cu<sub>2</sub>O nanocubes.

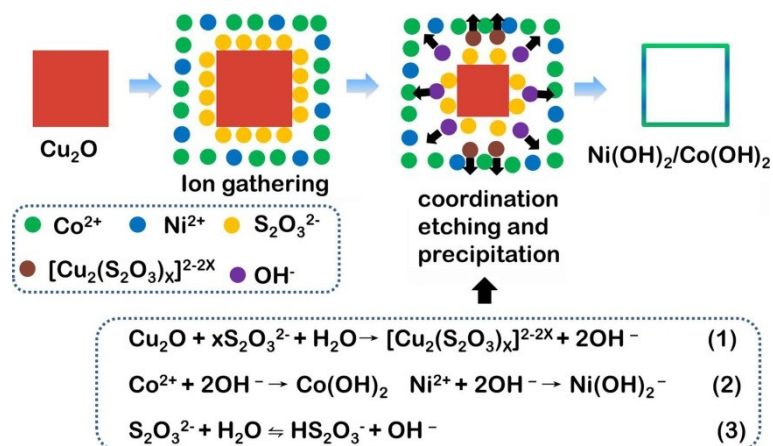

**Fig. S4** Schematic illustration of the preparation of  $\text{Ni(OH)}_2/\text{Co(OH)}_2$  nanocages.

Coordination etching of  $\text{Cu}_2\text{O}$  templates is based on the stronger interaction between  $\text{Cu}^+$  and  $\text{S}_2\text{O}_3^{2-}$  relative to the interaction of  $\text{Cu}^+-\text{O}^{2-}$  within the  $\text{Cu}_2\text{O}$  templates (Equation 1). The  $\text{OH}^-$  ions generated from  $\text{Cu}_2\text{O}$  etching can facilitate the precipitation of  $\text{Co}^{2+}$  and  $\text{Ni}^{2+}$  (Equation 2), and meanwhile the exhaustion of  $\text{OH}^-$  for the production of  $\text{Ni(OH)}_2/\text{Co(OH)}_2$  offers a driving force for the hydrolysis of  $\text{S}_2\text{O}_3^{2-}$  ions (Equation 3). Note that the PVP molecule as a surfactant participates in the coordination etching and precipitation reaction.



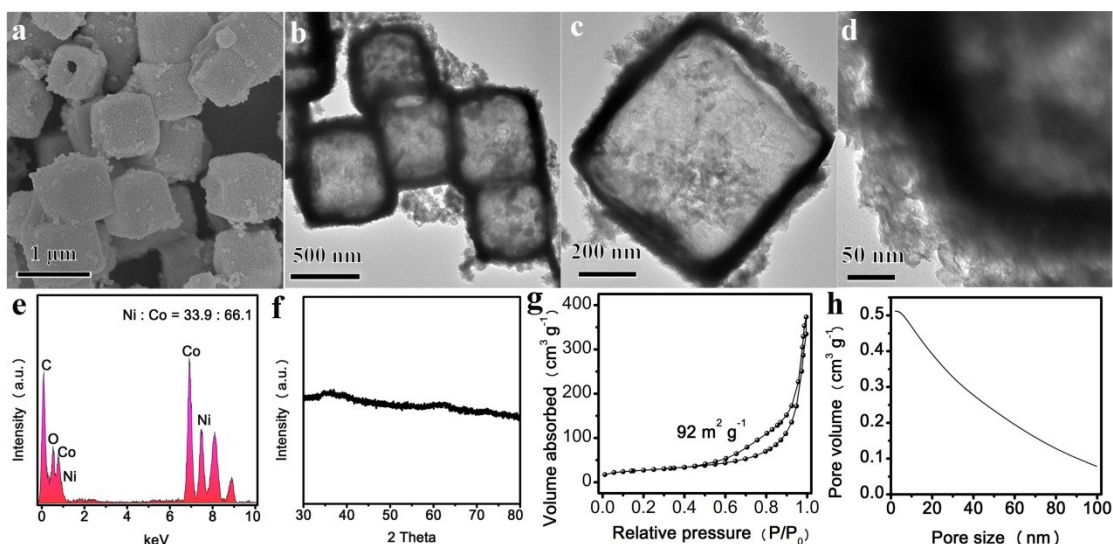

**Fig. S5** (a) SEM, (b-d) TEM images, (e) EDX spectrum, (f) XRD pattern, (g)  $N_2$  adsorption-desorption curve and (h) its corresponding pore size distribution of  $Ni(OH)_2/Co(OH)_2$  nanocages.

SEM (Fig. S5a) and TEM (Fig. S5b-d) observations demonstrate that the obtained  $Ni(OH)_2/Co(OH)_2$  products enable a high-quality cavity structure with an exterior diameter of 750 nm, and meanwhile inherit the geometrics and dimensions of the  $Cu_2O$  nanocubes templates well. The corresponding EDX spectrum (Fig. S5e) reveals that the ratio of Ni/Co is close to the addition ratio (1:2). Besides, the XRD pattern (Fig. S5f) indicates the complete removal of  $Cu_2O$  templates and the formation of an amorphous structure of the  $Ni(OH)_2/Co(OH)_2$  product. The  $N_2$  adsorption-desorption measurements (Figure S5g-h) exhibit a high surface area of  $92 \text{ m}^2 \text{ g}^{-1}$  and the presence of macro/mesoporous structure.

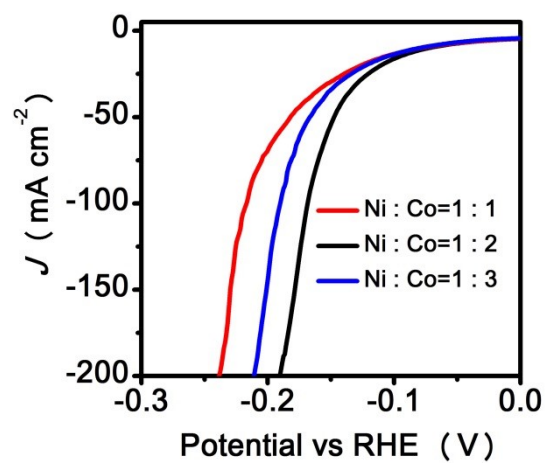

**Fig. S6** The LSV curves of N-NiS<sub>2</sub>/CoS<sub>2</sub> interfaces with different NiS<sub>2</sub>/CoS<sub>2</sub> ratios.

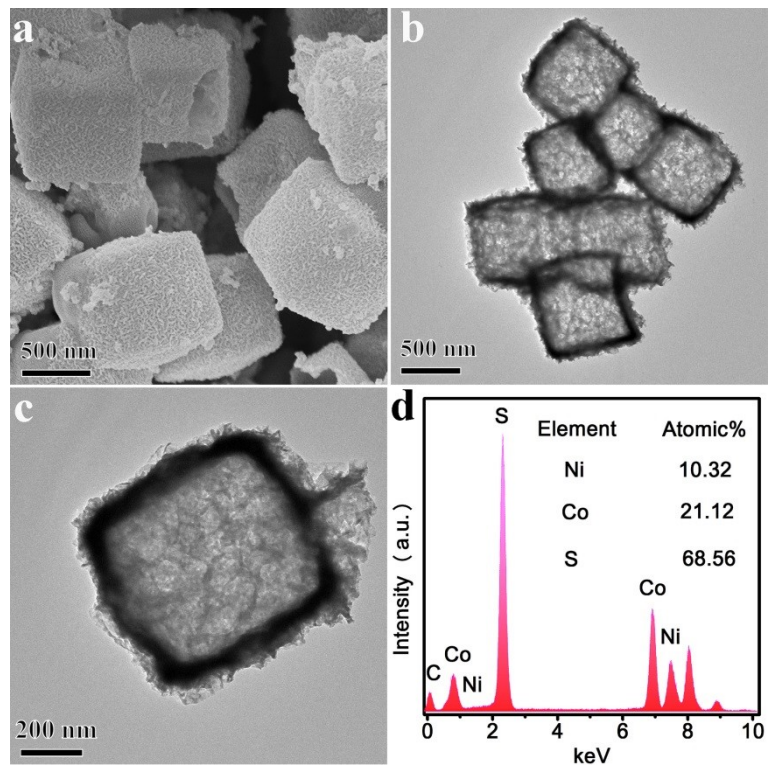

**Fig. S7** (a) SEM image, (b,c) TEM images, and (d) their corresponding EDX spectrum of NiS<sub>2</sub>/CoS<sub>2</sub>.

The NiS<sub>2</sub>/CoS<sub>2</sub> nanocages were synthesized by the thermal treatment of sulfur powder and the Ni(OH)<sub>2</sub>/Co(OH)<sub>2</sub> at Ar atmosphere. The as-obtained NiS<sub>2</sub>/CoS<sub>2</sub> product well inherited the hollow structure of Ni(OH)<sub>2</sub>/Co(OH)<sub>2</sub> (Fig. S7a-c). The EDX spectrum (Fig. S7d) and XRD pattern (Fig. 3h) consistently revealed the NiS<sub>2</sub>/CoS<sub>2</sub> products existed in the form of NiS<sub>2</sub>/CoS<sub>2</sub> heterostructure with the NiS<sub>2</sub>/CoS<sub>2</sub> molar ratio of 1:2.

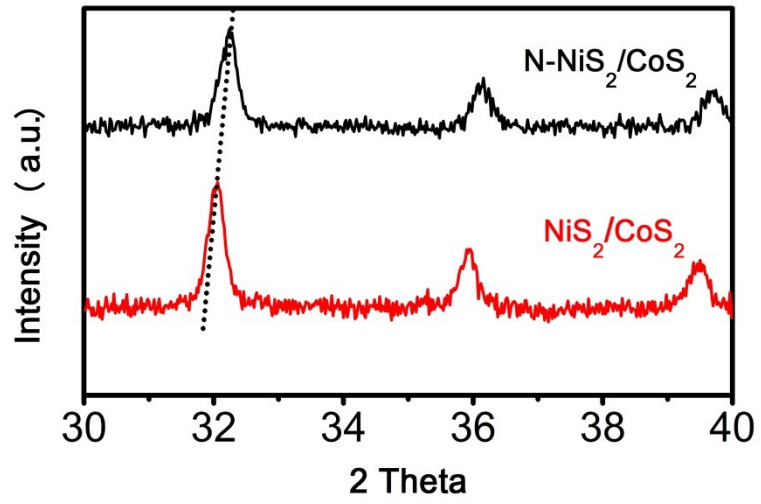

**Fig. S8** Partially enlarged area of XRD patterns in Fig. 3h.

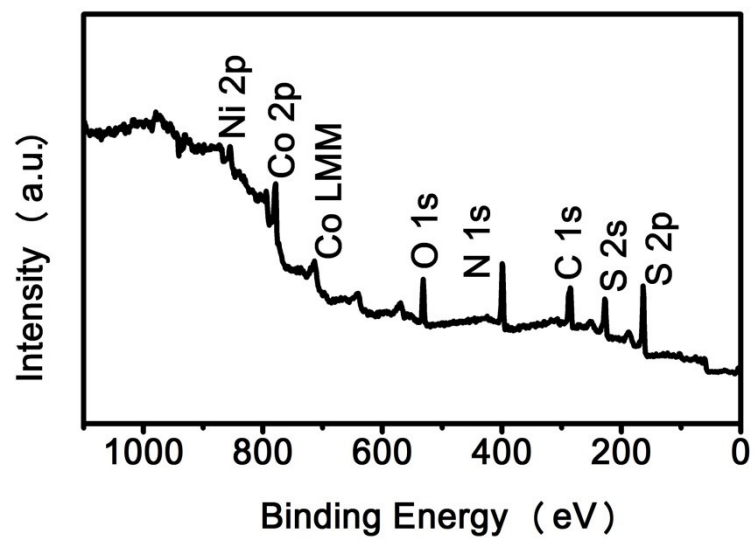

**Fig. S9.** XPS survey spectrum of N-NiS<sub>2</sub>/CoS<sub>2</sub>.

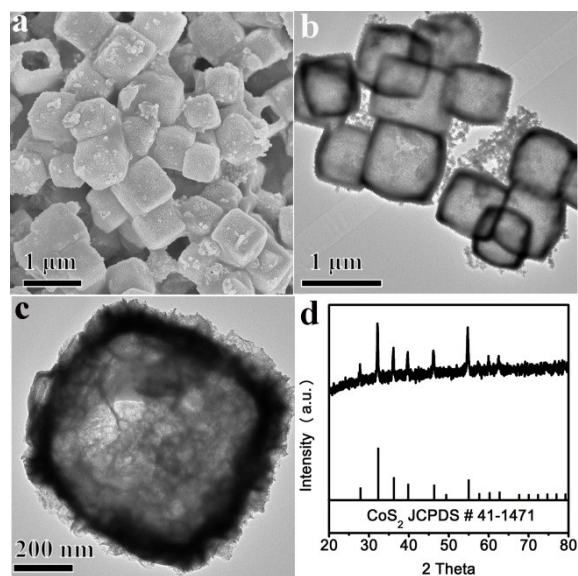

**Fig. S10** (a) SEM image, (b,c) TEM images, and (d) their corresponding XRD patterns of CoS<sub>2</sub>.

The obtained CoS<sub>2</sub> samples show an average side length of 750 nm and well-defined hollow structure, as revealed by the SEM (Fig. S10a) and TEM (Fig. S10b,c) images. The XRD pattern (Fig. S10d) demonstrates that the typical peaks are indexed into the cubic CoS<sub>2</sub> structure (JCPDS 41-1471).

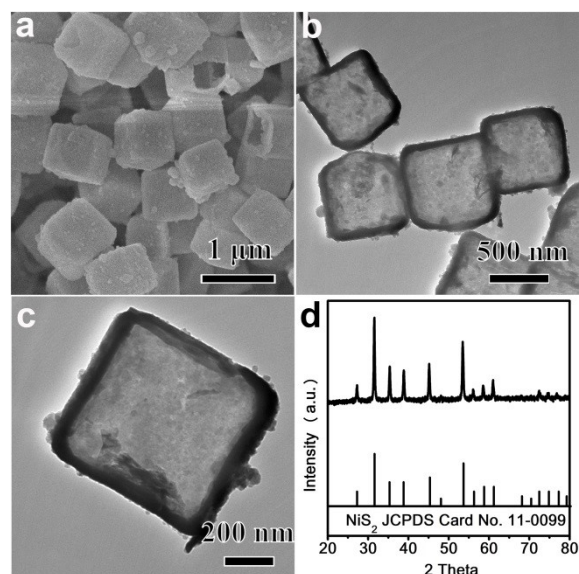

**Fig. S11.** (a) SEM image, (b,c) TEM images, and (d) their corresponding XRD patterns of NiS<sub>2</sub>.

The as-prepared NiS<sub>2</sub> sample inherits the dimension and geometry structure of Cu<sub>2</sub>O templates, and exhibits a cavity structure with an average side length of 750 nm, as indicated by SEM (Fig. S11a) and TEM (Fig. S11b,c) observations. XRD patterns of the obtained product clearly present the presence of the cubic NiS<sub>2</sub> structure (Fig. S11d).

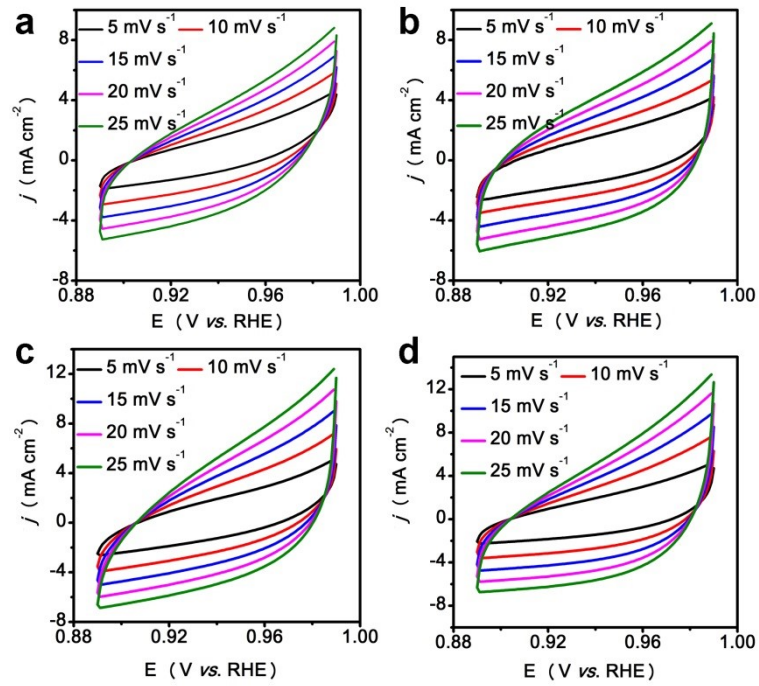

**Fig. S12.** Cyclic voltammograms for (a)  $\text{NiS}_2$ , (b)  $\text{CoS}_2$ , (c)  $\text{NiS}_2/\text{CoS}_2$ , and (d)  $\text{N-NiS}_2/\text{CoS}_2$  in the non-Faradaic capacitive range at the scanning rate of 5, 10, 15, 20, and  $25 \text{ mV s}^{-1}$ .



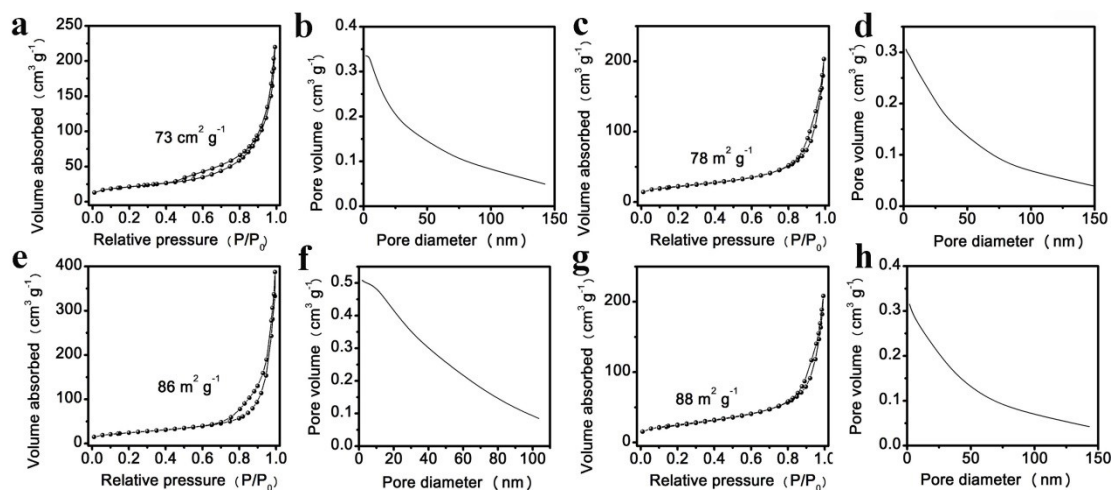

**Fig. S13**  $N_2$  adsorption-desorption curves and their corresponding pore diameter distribution curves: (a,b)  $NiS_2$ , (c,d)  $CoS_2$ , (e,f)  $NiS_2/CoS_2$ , and (g,h)  $N-NiS_2/CoS_2$

$N_2$  adsorption-desorption curves display that  $N-NiS_2/CoS_2$  enables a higher surface area of  $88 \text{ m}^2 \text{ g}^{-1}$  as compared to that of  $NiS_2$ ,  $CoS_2$ , and  $NiS_2/CoS_2$ , suggesting the most catalytic sites on  $N-NiS_2/CoS_2$ , which accords with the result of ECSAs.

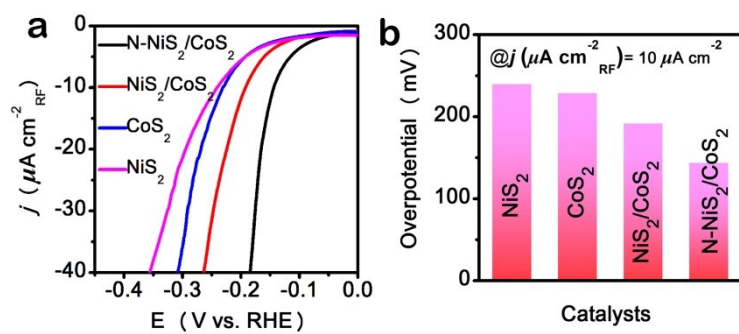

**Fig. S14** Normalized specific activities by RFs of different catalysts: (a) LSV curves and (b) overpotentials at the current density of  $10 \mu\text{A cm}^{-2}$ .

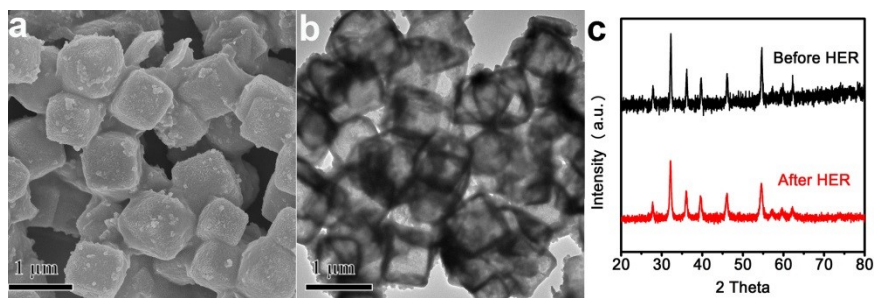

**Fig. S15** (a) SEM and (b) TEM images of the recovered N-NiS<sub>2</sub>/CoS<sub>2</sub> sample after HER. (c) A comparison of XRD patterns of N-NiS<sub>2</sub>/CoS<sub>2</sub> before and after HER.

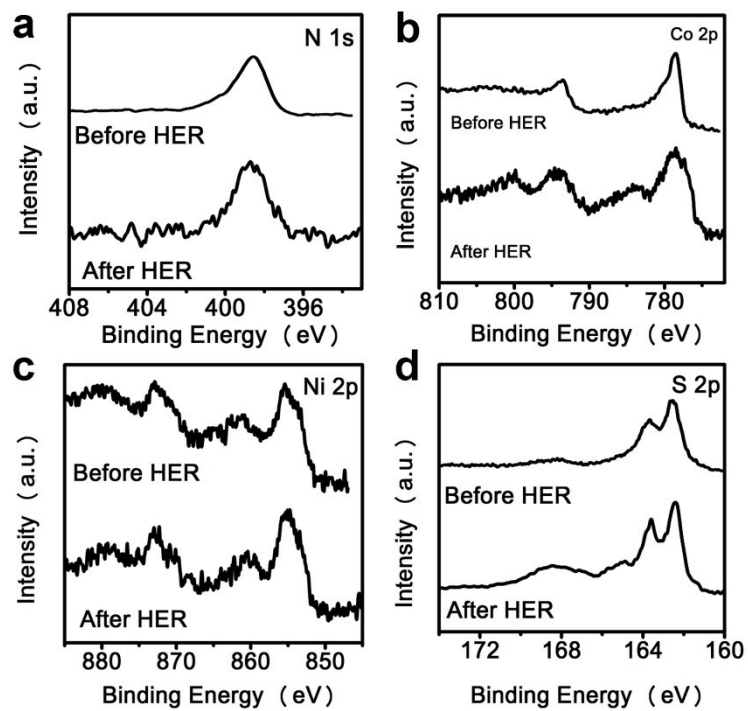

**Fig. S16** High resolution XPS spectra of (a) N 1s, (b) Co 2p, (c) Ni 2p, and (d) S 2p for N-NiS<sub>2</sub>/CoS<sub>2</sub> before and after HER.

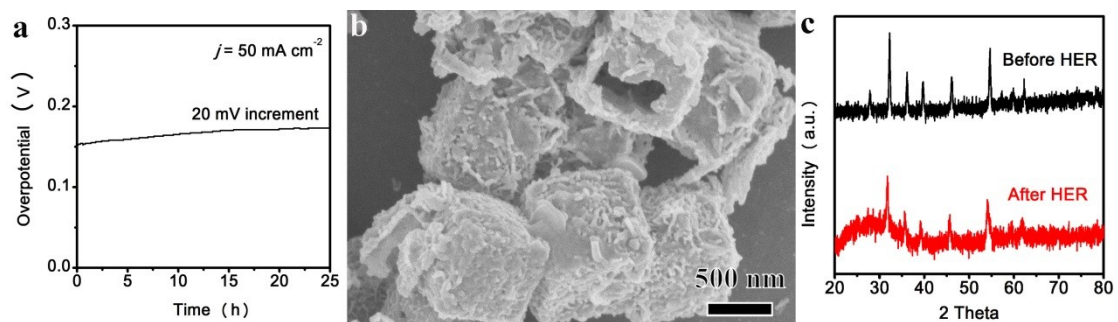

**Fig. S17** (a) Chronopotentiometric curves at a constant current density of  $50 \text{ mA cm}^{-2}$ . (b) SEM images of the recovered N-NiS<sub>2</sub>/CoS<sub>2</sub> sample after HER. (c) A comparison of XRD patterns of N-NiS<sub>2</sub>/CoS<sub>2</sub> before and after HER.

**Table S1.** Element composition ratio of N-NiS<sub>2</sub>/CoS<sub>2</sub> by using XPS analysis.

| Catalysts                            | N<br>(atomic%) | Ni<br>(atomic%) | Co<br>(atomic%) | S<br>(atomic%) |
|--------------------------------------|----------------|-----------------|-----------------|----------------|
| N-NiS <sub>2</sub> /CoS <sub>2</sub> | 1.11           | 10.73           | 22.82           | 65.34          |

**Table S2.** The summary of recently reported metal sulfides-based HER catalysts.

| Catalysts                                                      | $\square\eta_{10}$ (mV) | Tafel slope<br>(mV dec <sup>-1</sup> ) | Electrolyte | Ref.      |
|----------------------------------------------------------------|-------------------------|----------------------------------------|-------------|-----------|
| FeS <sub>2</sub> /CoS <sub>2</sub>                             | 78                      | 42                                     | 1.0 M KOH   | [8]       |
| Co-MoS <sub>2</sub> /Ni <sub>3</sub> S <sub>2</sub>            | 89                      | 62                                     | 1.0 M KOH   | [9]       |
| NiS <sub>2</sub> /MoS <sub>2</sub>                             | 204                     | 65                                     | 1.0 M KOH   | [10]      |
| CoS <sub>2</sub> /MoS <sub>2</sub>                             | 82                      | 59                                     | 1.0 M KOH   | [11]      |
| NiS@CoS                                                        | 30                      | 97                                     | 1.0 M KOH   | [12]      |
| NiS <sub>2</sub> /CoS <sub>2</sub> /MoS <sub>2</sub>           | 112                     | 59                                     | 1.0 M KOH   | [13]      |
| O-CoS <sub>2</sub> /MoS <sub>2</sub>                           | 97                      | 70                                     | 1.0 M KOH   | [14]      |
| MoS <sub>2</sub> /NiS                                          | 92                      | 113                                    | 1.0 M KOH   | [15]      |
| MoS <sub>2</sub> /Ni <sub>3</sub> S <sub>2</sub>               | 98                      | 61                                     | 1.0 M KOH   | [16]      |
| Co <sub>9</sub> S <sub>8</sub> /Ni <sub>3</sub> S <sub>2</sub> | 128                     | 98                                     | 1.0 M KOH   | [17]      |
| MoS <sub>2</sub> /NiS <sub>2</sub>                             | 62                      | 50                                     | 1.0 M KOH   | [18]      |
| N-NiS <sub>2</sub> /CoS <sub>2</sub>                           | 73                      | 65                                     | 1.0 M KOH   | This work |

**Table S3.** The calculated RF values of different samples.

| Catalyst | NiS <sub>2</sub> | CoS <sub>2</sub> | NiS <sub>2</sub> /CoS <sub>2</sub> | N-NiS <sub>2</sub> /CoS <sub>2</sub> |
|----------|------------------|------------------|------------------------------------|--------------------------------------|
| RF       | 2925             | 3525             | 4350                               | 4550                                 |

**Table S4.** The fitted results of the EIS plots in Fig. 5e.

| Catalyst               | NiS <sub>2</sub> | CoS <sub>2</sub> | NiS <sub>2</sub> /CoS <sub>2</sub> | N-NiS <sub>2</sub> /CoS <sub>2</sub> |
|------------------------|------------------|------------------|------------------------------------|--------------------------------------|
| $R_s$ ( $\Omega$ )     | 0.8              | 0.8              | 0.8                                | 0.8                                  |
| $R_{CT}$ ( $\Omega$ )  | 33.0             | 17.3             | 13.0                               | 7.1                                  |
| $R_{Por}$ ( $\Omega$ ) | 2.3              | 2.7              | 1.5                                | 0.9                                  |

## Reference

- [1] B. Qiu, L. Cai, Y. Wang, X. Guo, S. Ma, Y. Zhu, Y. H. Tsang, Z. Zheng, R. Zheng, Y. Chai, *Small* **2019**, 15, 1904507.
- [2] C. C. McCrory, S. Jung, J. C. Peters, T. F. Jaramillo, *J. Am. Chem. Soc.* **2013**, 135, 16977.
- [3] G. Kresse, J. Furthmüller, *Comput. Mater. Sci.* **1996**, 6, 15.
- [4] G. Kresse, J. Furthmüller, *Phys. Rev. B* **1996**, 54, 11169.
- [5] J. P. Perdew, K. Burke, M. Ernzerhof, *Phy. Rev. Lett.* **1996**, 77, 3865.

- [6] J. Yin, Y. Li, F. Lv, M. Lu, K. Sun, W. Wang, L. Wang, F. Cheng, Y. Li, P. Xi, *Adv. Mater.* **2017**, 29, 1704681.
- [7] G. Henkelman, B. P. Uberuaga, H. Jónsson, *J. Chem. Phys.* **2000**, 113, 9901.
- [8] Y. Li, J. Yin, L. An, M. Lu, K. Sun, Y. Q. Zhao, D. Gao, F. Cheng, P. Xi, *Small* **2018**, 14, 1801070.
- [9] L. Zhang, Y. Zheng, J. Wang, Y. Geng, B. Zhang, J. He, J. Xue, T. Frauenheim, M. Li, *Small* **2021**, 17, 2006730.
- [10] P. Kuang, T. Tong, K. Fan, J. Yu, *ACS Catal.* **2017**, 7, 6179.
- [11] Y. Li, W. Wang, B. Huang, Z. Mao, R. Wang, B. He, Y. Gong, H. Wang, *J. Energy Chemistry* **2021**, 57, 99.
- [12] Y. Yang, Y. Zhang, Y. Zhou, C. Zhu, Y. Xie, L. Lv, W. Chen, Y. He, Z. Hu, *Int. J. Hydrogen Energy* **2019**, 44, 26753.
- [13] Y. Zhang, M. Shi, C. Wang, Y. Zhu, N. Li, X. Pu, A. Yu, J. Zhai, *Sci. Bull.* **2020**, 65, 359.
- [14] J. Hou, B. Zhang, Z. Li, S. Cao, Y. Sun, Y. Wu, Z. Gao, L. Sun, *ACS Catal.* **2018**, 8, 4612.
- [15] Z. Zhai, C. Li, L. Zhang, H.-C. Wu, N. Tang, W. Wang, J. Gong, *J. Mater. Chem. A* **2018**, 6, 9833.
- [16] Y. Yang, K. Zhang, H. Lin, X. Li, H. C. Chan, L. Yang, Q. Gao, *ACS Catal.* **2017**, 7, 2357.
- [17] F. Du, L. Shi, Y. Zhang, T. Li, J. Wang, G. Wen, A. Alsaedi, T. Hayat, Y. Zhou, Z. Zou, *Appl. Catal. B: Environ.* **2019**, 253, 246.
- [18] J. Lin, P. Wang, H. Wang, C. Li, X. Si, J. Qi, J. Cao, Z. Zhong, W. Fei, J. Feng, *Adv. Sci.* **2019**, 6, 1900246.
